# Supplementary material
Source: PubMed Central journal article supplement (PMC5154376)
Supplement: NIHMS70693-supplement-Supplementary_Figures.pdf [file NIHMS70693-supplement-Supplementary_Figures.pdf]

**A: PKG[C42S]<sup>KI</sup> with Paxilline (showing transient constriction)**

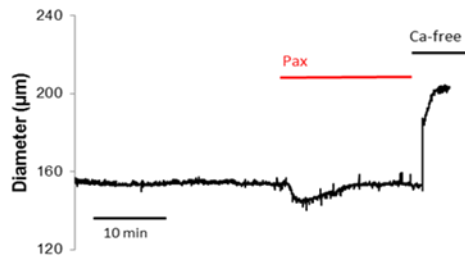

**B: Averaged changes to diameter**

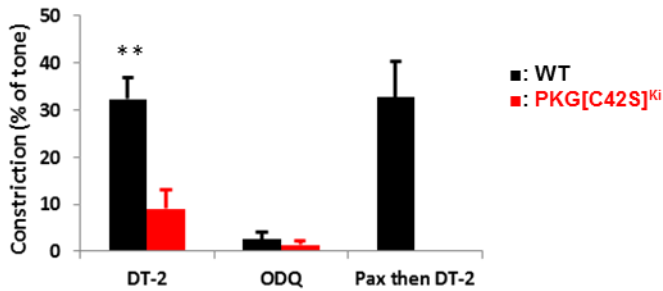

**C: WT with DT-2**

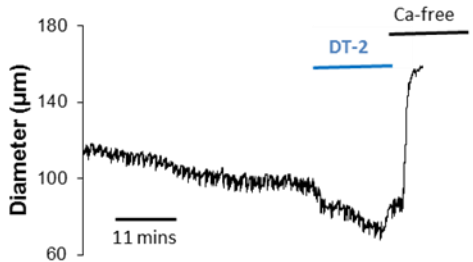

**D: PKG[C42S]<sup>KI</sup> with DT-2**

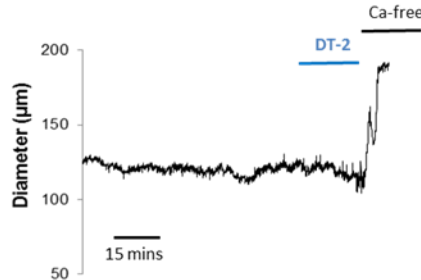

**E: WT with Pax then DT-2**

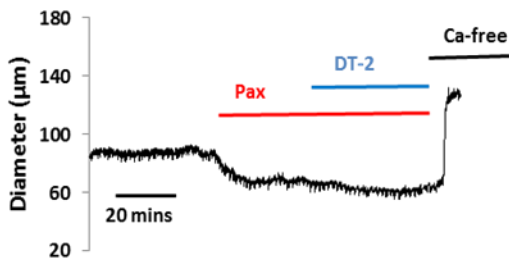

**Supplementary Figure 1: Oxidant-activated PKG is required for BK channel activity to oppose pressurize-induced constriction.**

A. Representative example of a small, transient constriction occasionally seen in pressure-constricted mesenteric arteries from PKG[C42S]<sup>KI</sup> mice. B: Constriction of WT and PKG[C42S]<sup>KI</sup> arteries to the direct PKG inhibitor DT-2 (WT, n = 6 arteries from 6 mice; PKG[C42S]<sup>KI</sup>, n = 4 arteries from 4 mice;  $P = 0.007$ ), the sGC inhibitor ODQ (WT, n = 3 arteries from 3 mice; PKG[C42S]<sup>KI</sup>, n = 3 arteries from 3 mice; not significant) and paxilline followed by DT-2 (n = 4 arteries from 4 WT mice). C. Representative diameter recordings of a pressure-constricted mesenteric artery from a WT mouse incubated with DT-2 (3  $\mu$ M). D: Representative diameter recordings of a PKG[C42S]<sup>KI</sup> pressure-constricted mesenteric artery incubated with DT-2 (3  $\mu$ M). E. Representative diameter recordings of a WT mesenteric artery constricted first with paxilline (1  $\mu$ M) and then co-incubated with DT-2 (3  $\mu$ M).

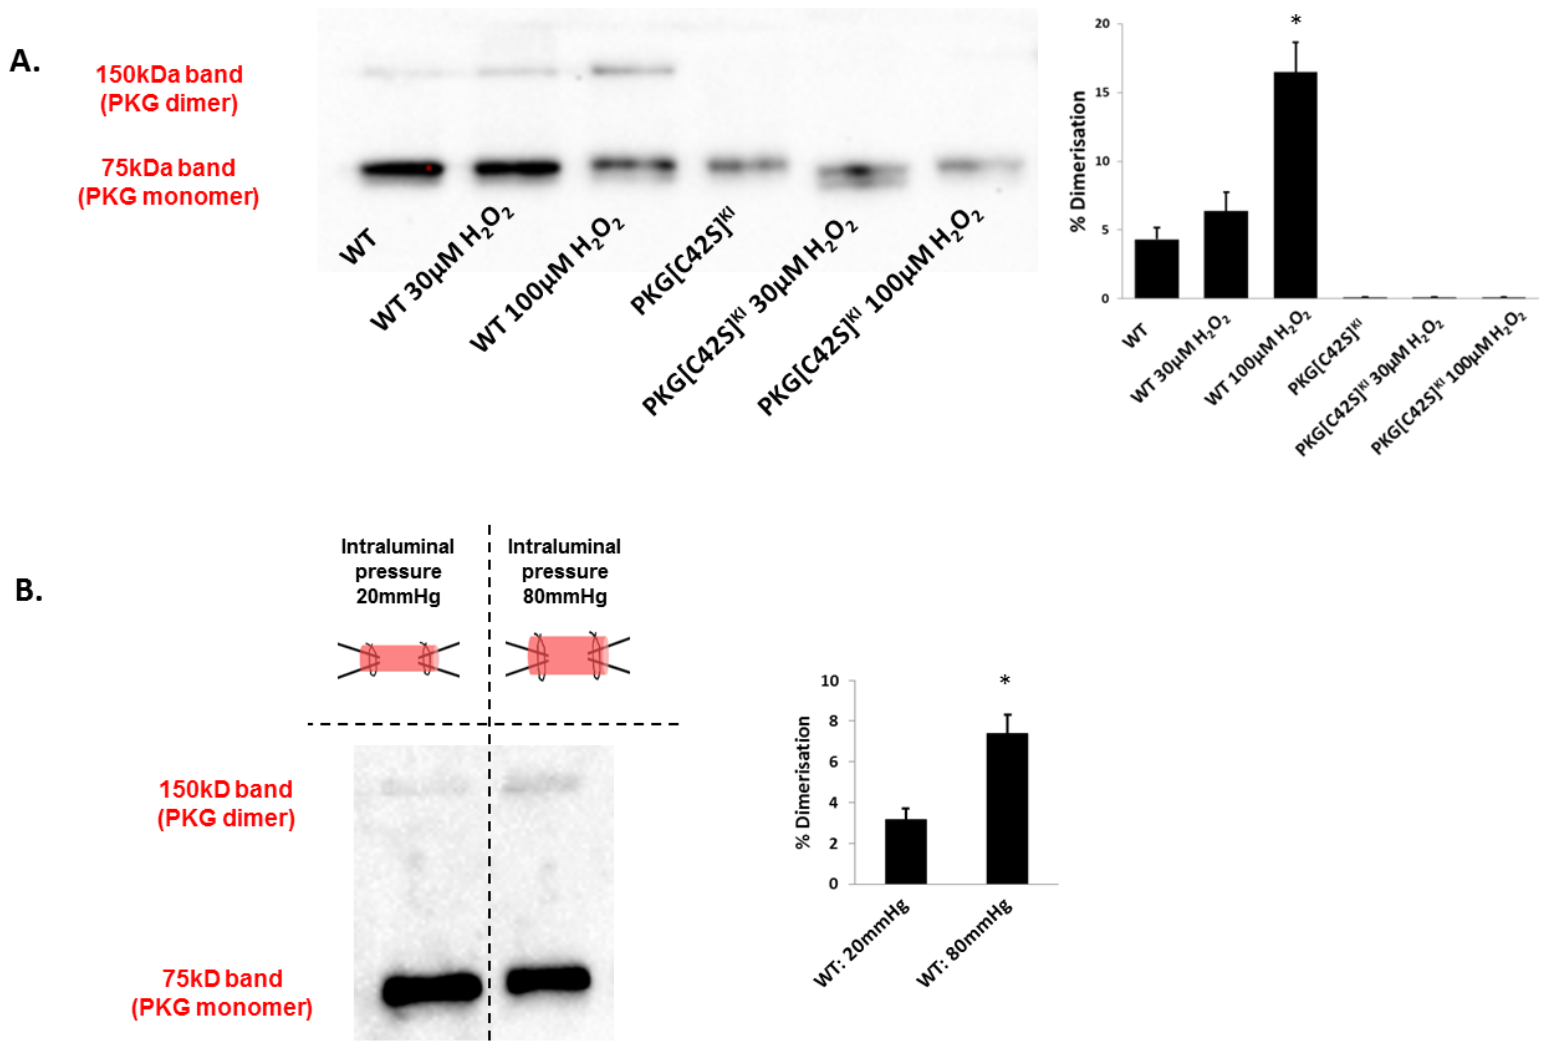

**Supplementary Figure 2: Oxidative dimerization of PKG in arteries exposed to pressure and H<sub>2</sub>O<sub>2</sub>.**

A: Representative western blot (left) and summary data showing overall amounts (right) of dimerized PKG from freshly dissected, pooled (unpressurized) mesenteric arteries in response to incubation with H<sub>2</sub>O<sub>2</sub>, presented as means ± SEM (\**P* < 0.01, compared with no-H<sub>2</sub>O<sub>2</sub> control; WT, n = 9 arteries from 9 mice; WT + 30 µM H<sub>2</sub>O<sub>2</sub>, n = 5 arteries from 5 mice; WT + 100 µM H<sub>2</sub>O<sub>2</sub>, n = 9 arteries from 9 mice). B: Representative western blot (left) and summary data showing overall amounts (right) of dimerized PKG from individual WT arteries pressurized to 20 (n = 8 arteries from 8 mice) or 80 mmHg (n = 8 arteries from 8 mice) (\**P* = 0.04 compared with 20 mmHg).

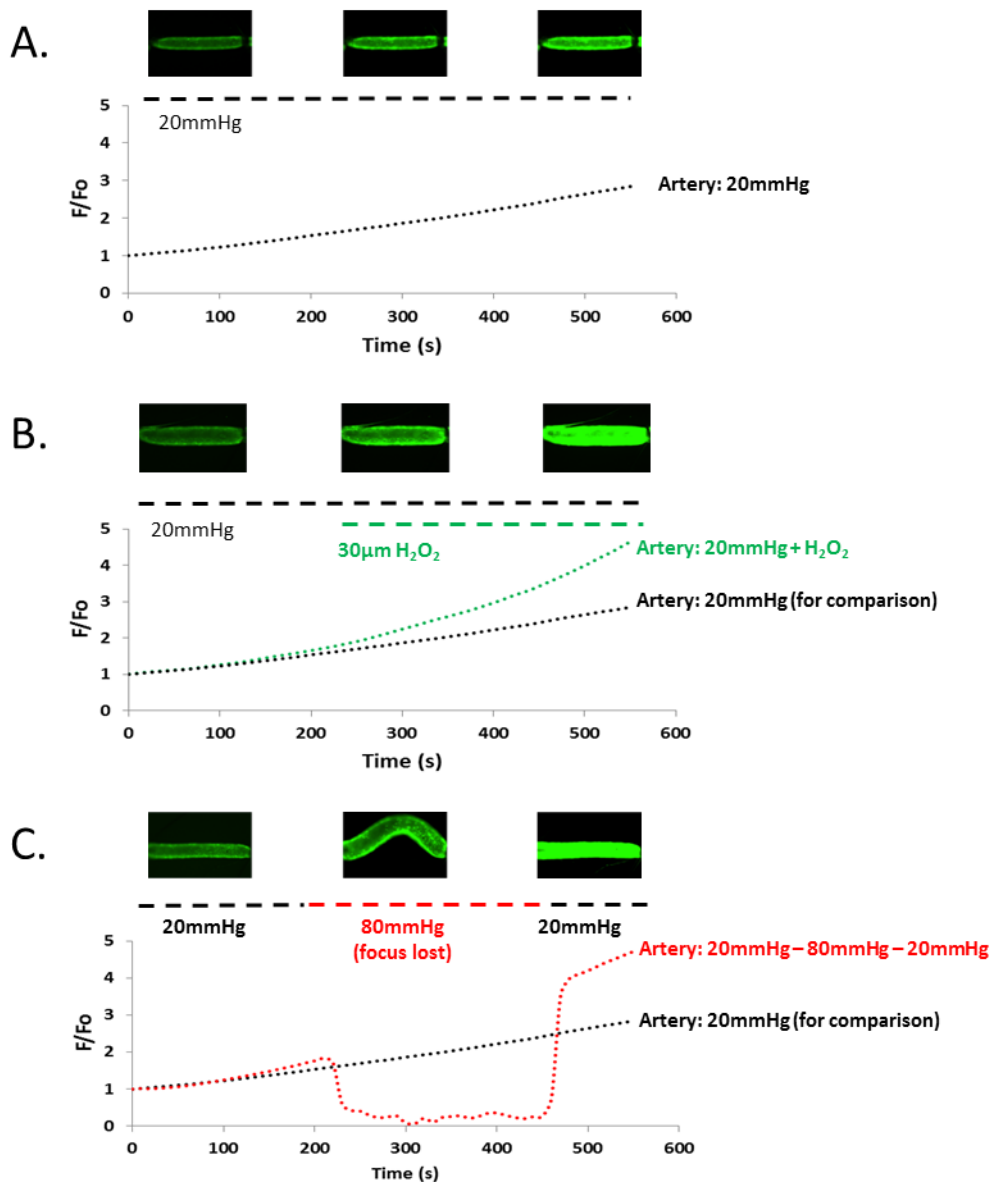

### Supplementary Figure 3: Intraluminal pressure increases oxidant amounts in mesenteric arteries.

A: Representative trace showing the rate in the increase in fluorescence in CM-H<sub>2</sub>DCFDA – loaded WT arteries pressurized at 20 mmHg. B: Representative trace showing the increase in fluorescence in CM-H<sub>2</sub>DCFDA WT arteries pressurized at 20 mmHg with exogenous application of the oxidant 30 μM H<sub>2</sub>O<sub>2</sub> (at 240 seconds); end point comparisons at 9 minutes: 20 mmHg control (F/F<sub>0</sub> = 3.0 ± 0.3) compared to 20 mmHg + H<sub>2</sub>O<sub>2</sub> (F/F<sub>0</sub> = 4.2 ± 0.3; n = 4 arteries from 4 mice, P = 0.01). C: Representative trace showing the increase in fluorescence in CM-H<sub>2</sub>DCFDA WT arteries pressurized initially at 20 mmHg, then subject to 80 mmHg (210–480 seconds) and finally returned to 20 mmHg (to control for surface area and tissue density/longitudinal stretch); end point comparisons at 9 minutes: 20 mmHg (F/F<sub>0</sub> = 3.0 ± 0.3) compared to 80 mmHg (F/F<sub>0</sub> = 4.3 ± 0.2; n = 4 arteries from 4 mice, p = 0.01).

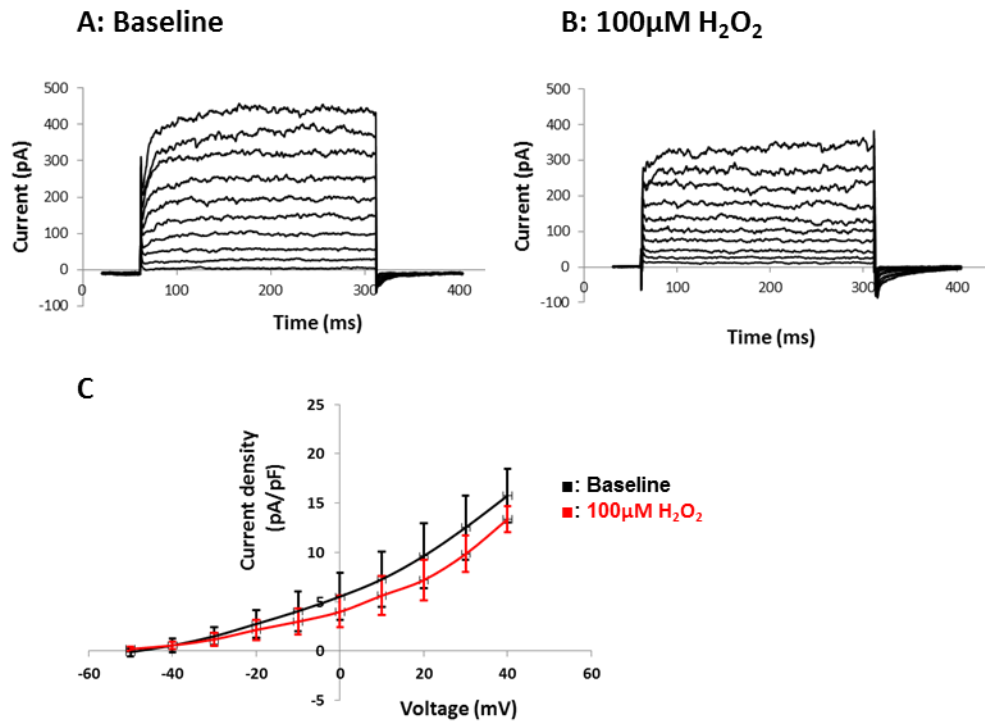

**Supplementary Figure 4: H<sub>2</sub>O<sub>2</sub> has no effect on K<sup>+</sup> currents in the absence of Ca<sup>2+</sup> sparks.**

A: Representative trace of outward currents from WT mesenteric VSMCs elicited by a voltage step protocol (10-mV, 250-ms steps from a holding potential of -80 mV), measured in the perforated-patch configuration in the presence of ryanodine and nifedipine (20  $\mu$ M each). B: Representative trace of outward currents elicited from WT mesenteric VSMCs by a voltage step protocol after incubation with 100  $\mu$ M H<sub>2</sub>O<sub>2</sub> (a concentration that causes oxidative disulphide bond formation between the cysteine residues within the PKG dimer), measured in the whole-cell configuration in the presence of 20  $\mu$ M ryanodine. C: Current density–voltage relationship for VSMCs before and after incubation with H<sub>2</sub>O<sub>2</sub> (n=3 cells from 3 mice). There was no significant difference in outward currents between baseline and H<sub>2</sub>O<sub>2</sub> treatment.

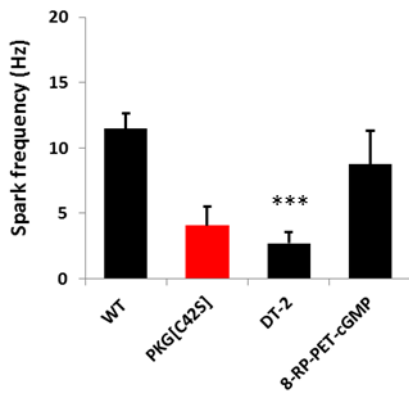

**Supplementary Figure 5: Pharmacological manipulation of Ca<sup>2+</sup> sparks.**

DT-2 (3  $\mu$ m) significantly reduced Ca<sup>2+</sup> spark frequency in intact arteries pressurized at 80 mmHg (\* $p < 0.01$ , compared to WT), but this effect was not observed with the cGMP antagonist 8-RP-PET-cGMP (WT,  $n = 8$  arteries from 7 mice; PKG[C42S],  $n = 14$  arteries from 11 mice; DT-2,  $n = 9$  arteries from 9 mice; 8-RP-PET-cGMP,  $n = 7$  arteries from 7 mice).

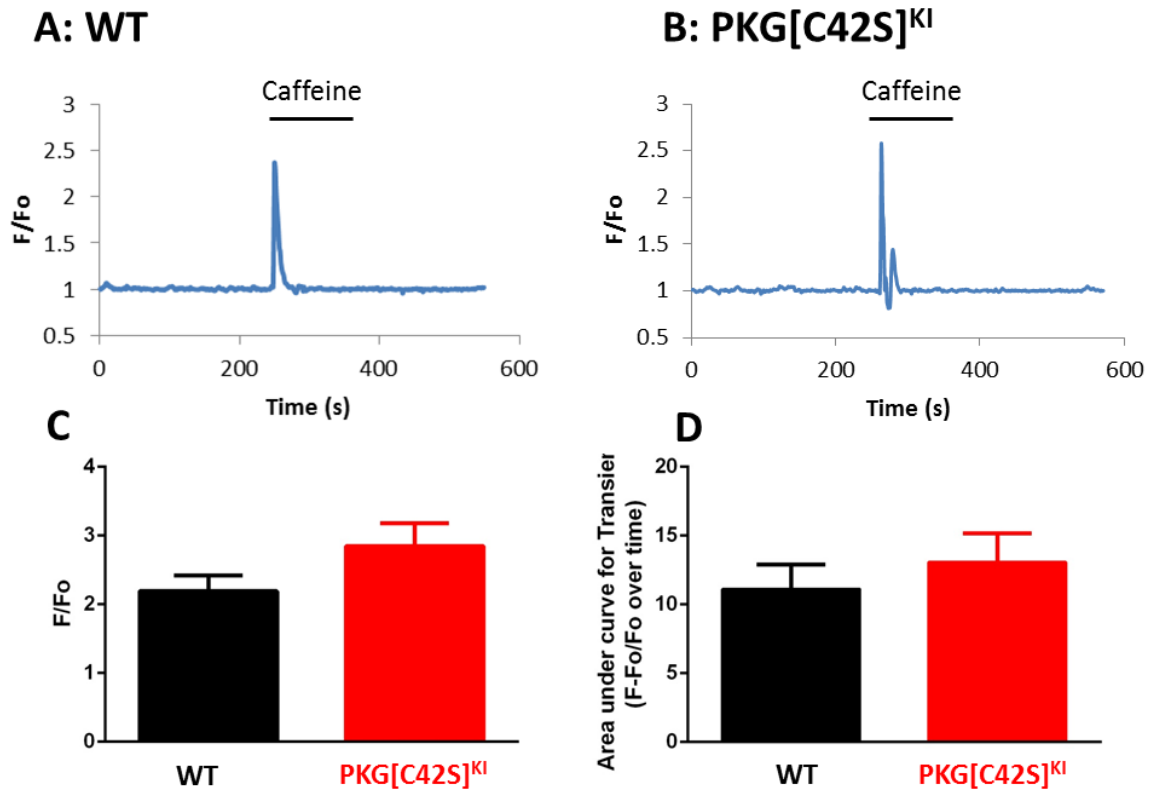

**Supplementary Figure 6: Caffeine induced Ca<sup>2+</sup> transients in WT and PKG[C42S]<sup>KI</sup> mesenteric arteries**

A and B: Representative traces of changes to fractional fluorescence (F/Fo) following application of 10 mM caffeine. C: Comparison of caffeine peak amplitude (F/Fo) between WT (n=4 arteries from 3 mice) and PKG[C42S]<sup>KI</sup> (n=5 arteries from 3 mice). D: Comparison of the Area under the curve (AUC) for each caffeine peak between WT (n=4 arteries from 3 mice) and PKG[C42S]<sup>KI</sup> (n=5 arteries from 3 mice)

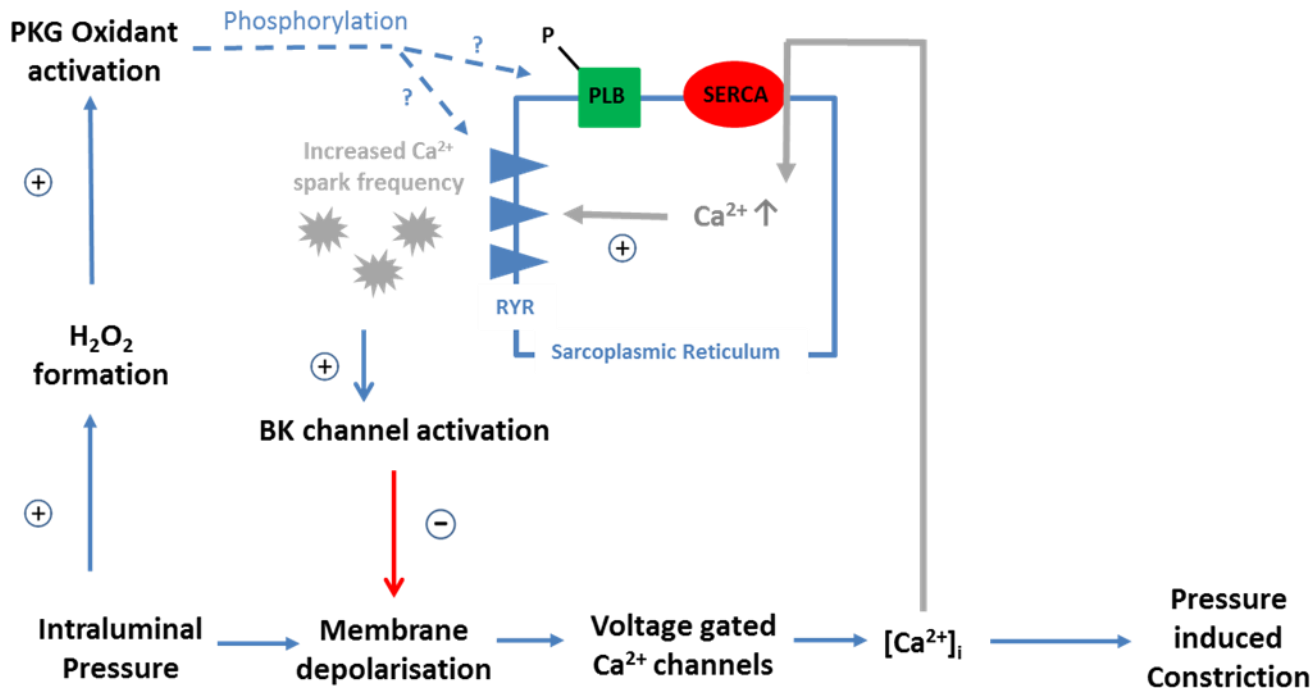

**Supplementary Figure 7: Working model for the role of PKG and pressure-induced ROS.**

Intraluminal pressure results in formation of  $\text{H}_2\text{O}_2$ , which causes oxidative disulfide bond formation between appositioned cysteine residues within a PKG dimer and thus activates the kinase. Once activated, PKG works in conjunction with membrane depolarization to sustain physiological amounts of  $\text{Ca}^{2+}$  spark activity. Blue triangles within the sarcoplasmic reticulum represent ryanodine receptors.
